# Supplementary material for: Untangling a sticky business
Source: Springer Nature journal article supplement (doi:10.1186/s13046-020-01645-4), 1993-01-01

**a**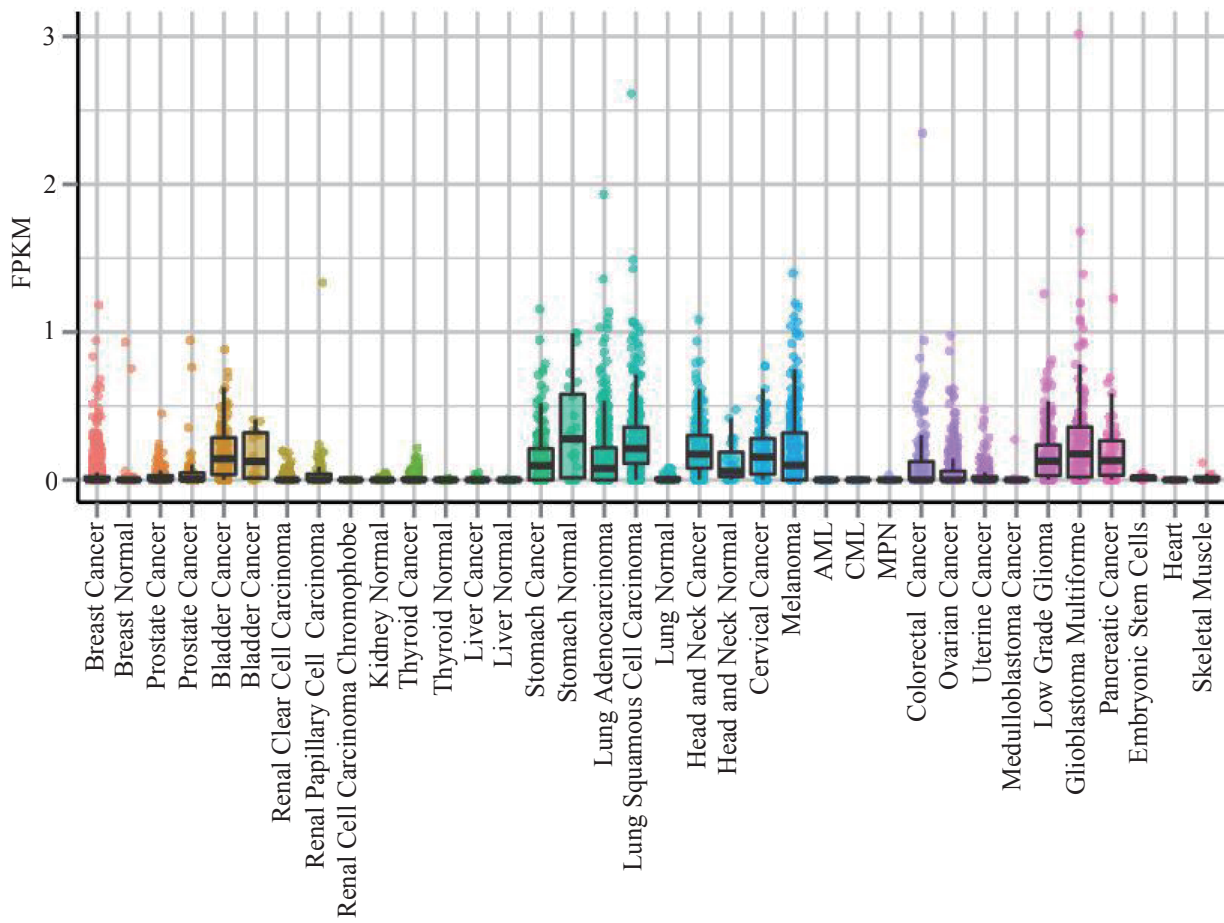**b**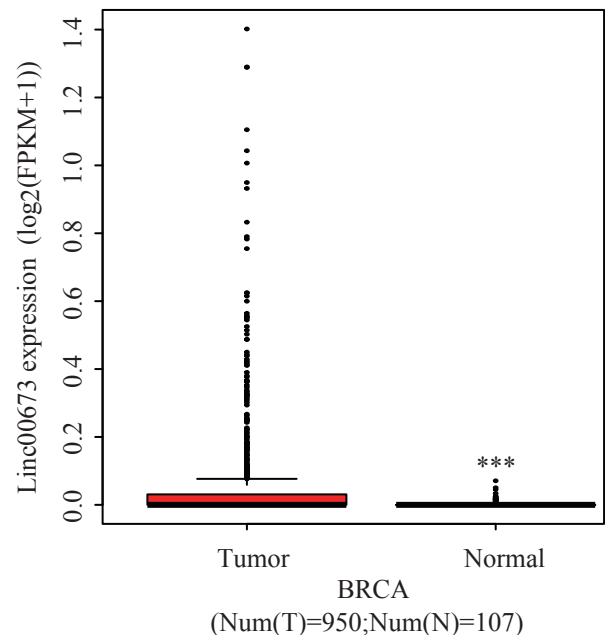

Supplement: MOESM1 [file 18267574]
