# Supplementary material for: Untangling a sticky business
Source: Springer Nature journal article supplement (doi:10.1186/s13046-020-01645-4), 1993-01-01

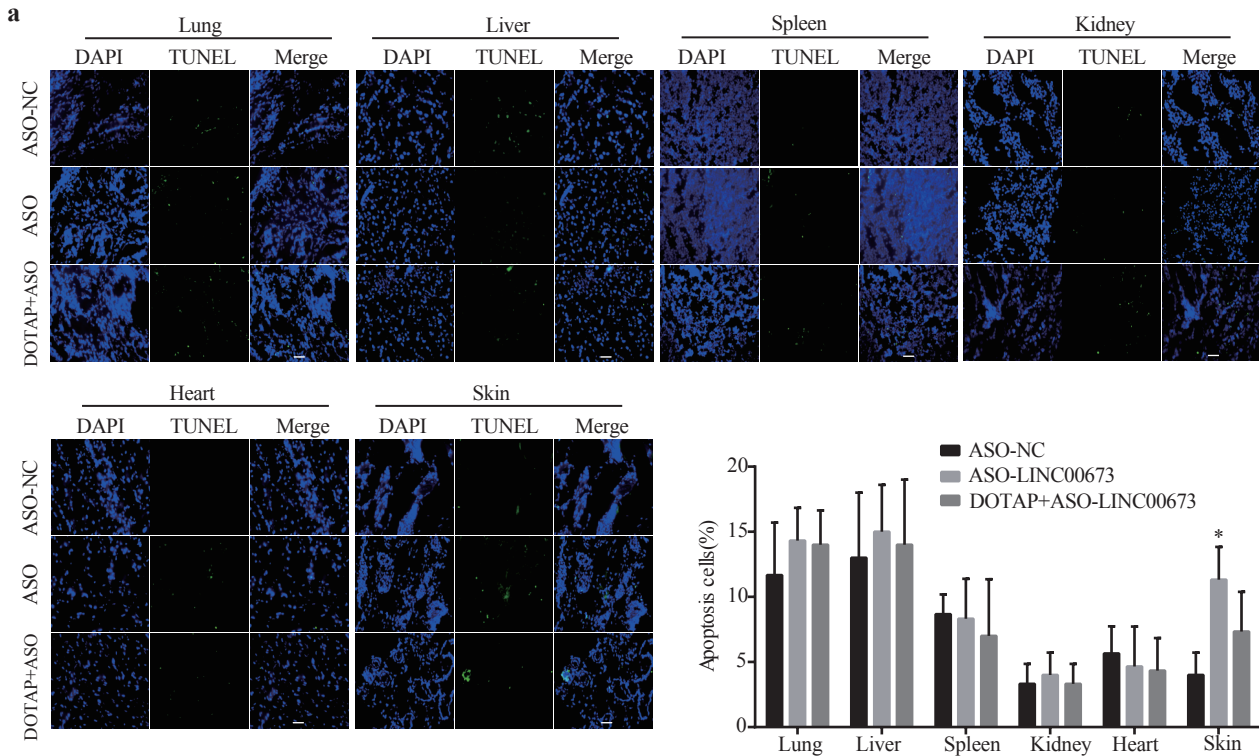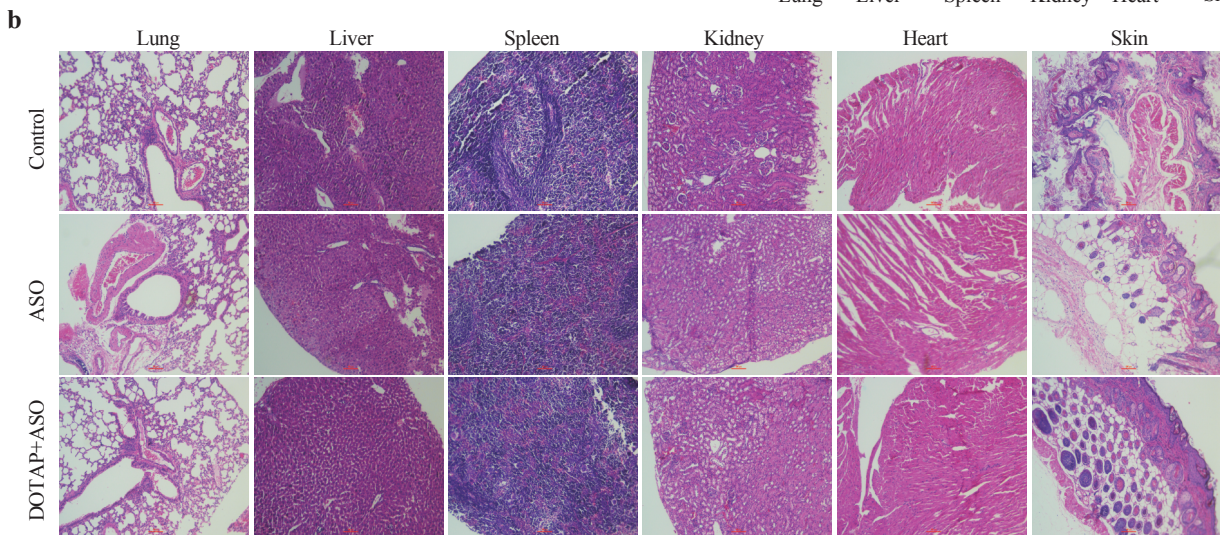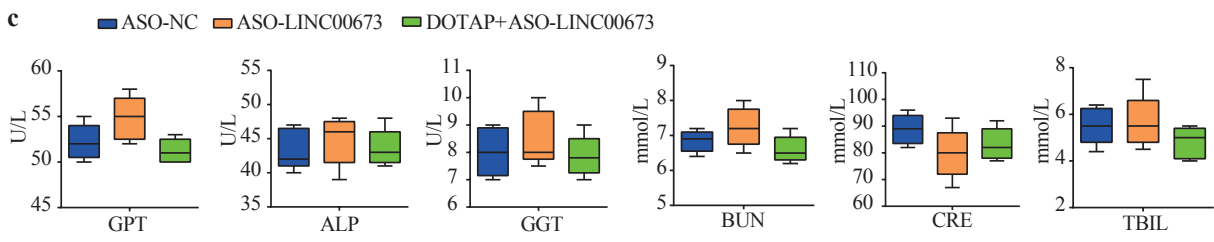

Supplement: MOESM2 [file 18267574]
